# Supplementary material for: Prenatal antidepressant use and risk of attention-deficit/hyperactivity disorder in offspring: population based cohort study
Source: PubMed Central journal article supplement — BMJ. 2017 Jun 1;357:j2350. doi: 10.1136/bmj.j2350 (PMC5450015; doi:10.1136/bmj.j2350), 2017-06-01
Supplement: mank037509.ww1.pdf [file mank037509.ww1.pdf]

## **Appendix: Prenatal antidepressant exposure and the risk of attention-deficit hyperactivity disorder: A population based cohort study**

### Contents

Supplementary material 1: Treatment utilisation of antidepressants and antipsychotics in the cohort

Supplementary material 2: Treatment continuation and switching pattern in the cohort

Supplementary material 3: Sensitivity analysis of including children born after 2009

Supplementary material 4: Sensitivity analysis of extending exposure period

Supplementary material 5: Sensitivity analysis of excluding children with ADHD medication but no ADHD diagnosis

Supplementary material 6: Sensitivity analysis of including the first pregnancy only

Supplementary material 7: Sensitivity analysis: start of follow-up at 5 years old

Supplementary material 8: Sensitivity analysis: adjust maternal depression, anxiety and substance abuse only

Supplementary material 9: Comparisons of antidepressant exposure rate

**Supplementary material 1: Treatment utilisation of antidepressants and antipsychotics in the cohort**

| <b>Period</b>       | <b>SSRI<sup>a</sup><br/>only</b> | <b>Other<br/>antidepressant<br/>only</b> | <b>Antipsychotic<br/>only</b> | <b>SSRI and other<br/>antidepressant</b> | <b>SSRI and<br/>antipsychotic</b> | <b>Other antidepressant<br/>and antipsychotic</b> | <b>All<sup>b</sup></b> | <b>Non-<br/>exposed</b> |
|---------------------|----------------------------------|------------------------------------------|-------------------------------|------------------------------------------|-----------------------------------|---------------------------------------------------|------------------------|-------------------------|
| Before<br>Pregnancy | 553                              | 849                                      | 475                           | 360                                      | 171                               | 155                                               | 187                    | 187,868                 |
| During<br>Pregnancy | 425                              | 470                                      | 364                           | 129                                      | 101                               | 91                                                | 36                     | 189,002                 |
| 1st<br>Trimester    | 324                              | 294                                      | 298                           | 58                                       | 86                                | 69                                                | 14                     | 189,475                 |
| 2nd<br>Trimester    | 235                              | 273                                      | 280                           | 49                                       | 55                                | 59                                                | 13                     | 189,654                 |
| 3rd<br>Trimester    | 250                              | 320                                      | 298                           | 38                                       | 56                                | 56                                                | 8                      | 189,592                 |

<sup>a</sup>SSRI= Selective serotonin re-uptake inhibitor.

<sup>b</sup>Patients exposed to SSRI, other antidepressants and antipsychotics in that period.

**Supplementary material 2: Treatment continuation and switching pattern in the cohort**

| <b>During pregnancy</b>     | <b>SSRI only</b> | <b>Other antidepressant only</b> | <b>Antipsychotic only</b> | <b>SSRI and other antidepressant</b> | <b>SSRI and antipsychotic</b> | <b>Other antidepressant and antipsychotic</b> | <b>All</b> |
|-----------------------------|------------------|----------------------------------|---------------------------|--------------------------------------|-------------------------------|-----------------------------------------------|------------|
| Discontinued <sup>a</sup>   | 367              | 667                              | 234                       | 185                                  | 77                            | 76                                            | 58         |
| Continued <sup>b</sup>      | 144              | 156                              | 231                       | 42                                   | 42                            | 32                                            | 13         |
| New user                    | 155              | 217                              | 77                        | 38                                   | 19                            | 17                                            | 7          |
| Switched to other regimen   | 42               | 26                               | 10                        | 133                                  | 52                            | 47                                            | 116        |
| Switched from other regimen | 126              | 97                               | 56                        | 49                                   | 40                            | 42                                            | 16         |

<sup>a</sup>Patients who were on that treatment regimen before pregnancy and stopped before pregnancy started.

<sup>b</sup>Patients who were on that treatment regimen before pregnancy and continued when pregnancy started.

### Supplementary material 3: Sensitivity analysis of including children born after 2009

| <b>Exposure</b>                                                   | <b>Crude estimate</b> |       |         | <b>Model 1<sup>a</sup></b> |                    |         | <b>Model 2<sup>b</sup></b> |       |         | <b>Model 3<sup>c</sup></b> |       |         |      |      |      |       |
|-------------------------------------------------------------------|-----------------------|-------|---------|----------------------------|--------------------|---------|----------------------------|-------|---------|----------------------------|-------|---------|------|------|------|-------|
|                                                                   | HR                    | 95%CI | p-value | HR <sup>d</sup>            | 95%CI <sup>e</sup> | p-value | HR                         | 95%CI | p-value | HR                         | 95%CI | p-value |      |      |      |       |
| <b><i>Antidepressants (Included children born after 2009)</i></b> |                       |       |         |                            |                    |         |                            |       |         |                            |       |         |      |      |      |       |
| During Pregnancy                                                  | 2.21                  | 1.76  | 2.78    | <0.01                      | 2.33               | 1.85    | 2.94                       | <0.01 | 1.33    | 1.03                       | 1.73  | 0.03    | 1.32 | 1.01 | 1.72 | 0.04  |
| 1st Trimester                                                     | 2.37                  | 1.70  | 2.95    | <0.01                      | 2.39               | 1.81    | 3.15                       | <0.01 | 1.41    | 1.04                       | 1.91  | 0.03    | 1.36 | 1.00 | 1.86 | 0.05  |
| 2nd Trimester                                                     | 2.35                  | 1.74  | 3.18    | <0.01                      | 2.58               | 1.91    | 3.50                       | <0.01 | 1.44    | 1.04                       | 1.99  | 0.03    | 1.42 | 1.02 | 1.98 | 0.04  |
| 3rd Trimester                                                     | 2.31                  | 1.72  | 3.09    | <0.01                      | 2.47               | 1.84    | 3.32                       | <0.01 | 1.32    | 0.96                       | 1.82  | 0.09    | 1.35 | 0.97 | 1.87 | 0.07  |
| <b><i>SSRIs (Included children born after 2009)</i></b>           |                       |       |         |                            |                    |         |                            |       |         |                            |       |         |      |      |      |       |
| During Pregnancy                                                  | 2.10                  | 1.51  | 2.93    | <0.01                      | 2.16               | 1.55    | 3.03                       | <0.01 | 1.16    | 0.81                       | 1.67  | 0.41    | 1.06 | 0.74 | 1.53 | 0.75  |
| 1st Trimester                                                     | 2.14                  | 1.45  | 3.17    | <0.01                      | 2.26               | 1.52    | 3.35                       | <0.01 | 1.24    | 0.82                       | 1.88  | 0.31    | 1.13 | 0.75 | 1.72 | 0.71  |
| 2nd Trimester                                                     | 2.04                  | 1.26  | 3.29    | <0.01                      | 2.15               | 1.32    | 3.48                       | <0.01 | 1.13    | 0.69                       | 1.87  | 0.63    | 1.04 | 0.63 | 1.73 | 0.87  |
| 3rd Trimester                                                     | 2.13                  | 1.34  | 3.40    | <0.01                      | 2.18               | 1.36    | 3.49                       | <0.01 | 1.12    | 0.69                       | 1.82  | 0.65    | 1.09 | 0.67 | 1.78 | 0.72  |
| <b><i>Non-SSRIs (Included children born after 2009)</i></b>       |                       |       |         |                            |                    |         |                            |       |         |                            |       |         |      |      |      |       |
| During Pregnancy                                                  | 2.51                  | 1.92  | 3.29    | <0.01                      | 2.70               | 2.05    | 3.55                       | <0.01 | 1.56    | 1.16                       | 2.09  | <0.01   | 1.53 | 1.14 | 2.06 | <0.01 |
| 1st Trimester                                                     | 2.52                  | 1.78  | 3.67    | <0.01                      | 2.74               | 1.92    | 3.91                       | <0.01 | 1.66    | 1.15                       | 2.39  | <0.01   | 1.58 | 1.09 | 2.29 | <0.01 |
| 2nd Trimester                                                     | 2.64                  | 1.85  | 3.79    | <0.01                      | 2.98               | 2.07    | 4.28                       | <0.01 | 1.67    | 1.14                       | 2.44  | <0.01   | 1.65 | 1.12 | 2.42 | 0.01  |
| 3rd Trimester                                                     | 2.65                  | 1.87  | 3.75    | <0.01                      | 2.89               | 2.04    | 4.09                       | <0.01 | 1.54    | 1.07                       | 2.24  | 0.02    | 1.57 | 1.08 | 2.29 | 0.01  |

<sup>a</sup>Model 1 adjusted maternal age at delivery, infant's gender, birth year, birth hospital, parity, maternal underlying illness before delivery (pre-existing diabetes, epilepsy, gestational diabetes, hypertension; yes/no) and socioeconomic status.

<sup>b</sup>Model 2 adjusted all the factors in model 1 and maternal psychiatric conditions.

<sup>c</sup>Model 3 adjusted all the factors in model 2 and other psychiatric medication use.

<sup>d</sup>HR=Hazard ratio

<sup>e</sup>CI=Confidence interval

#### Supplementary material 4: Sensitivity analysis of extending exposure period

| <b>Exposure</b>                                              | <b>Crude estimate</b> |                          |      | <b>Model 1<sup>a</sup></b> |           |              | <b>Model 2<sup>b</sup></b> |                |           | <b>Model 3<sup>c</sup></b> |      |                |      |      |      |       |
|--------------------------------------------------------------|-----------------------|--------------------------|------|----------------------------|-----------|--------------|----------------------------|----------------|-----------|----------------------------|------|----------------|------|------|------|-------|
|                                                              | <b>HR<sup>d</sup></b> | <b>95%CI<sup>e</sup></b> |      | <b>p-value</b>             | <b>HR</b> | <b>95%CI</b> |                            | <b>p-value</b> | <b>HR</b> | <b>95%CI</b>               |      | <b>p-value</b> |      |      |      |       |
| <b><i>Antidepressants (exposure extended by 30 days)</i></b> |                       |                          |      |                            |           |              |                            |                |           |                            |      |                |      |      |      |       |
| During Pregnancy                                             | 2.36                  | 1.90                     | 2.94 | <0.01                      | 2.51      | 2.01         | 3.13                       | <0.01          | 1.51      | 1.18                       | 1.95 | <0.01          | 1.50 | 1.16 | 1.94 | <0.01 |
| 1st Trimester                                                | 2.41                  | 1.86                     | 3.13 | <0.01                      | 2.60      | 1.99         | 3.38                       | <0.01          | 1.60      | 1.20                       | 2.14 | <0.01          | 1.57 | 1.16 | 2.11 | <0.01 |
| 2nd Trimester                                                | 2.52                  | 1.93                     | 3.28 | <0.01                      | 2.73      | 2.09         | 3.57                       | <0.01          | 1.61      | 1.20                       | 2.15 | <0.01          | 1.60 | 1.19 | 2.15 | <0.01 |
| 3rd Trimester                                                | 2.32                  | 1.74                     | 3.08 | <0.01                      | 2.46      | 1.85         | 3.28                       | <0.01          | 1.37      | 1.00                       | 1.86 | 0.05           | 1.39 | 1.01 | 1.90 | 0.04  |
| <b><i>Antidepressants (exposure extended by 60 days)</i></b> |                       |                          |      |                            |           |              |                            |                |           |                            |      |                |      |      |      |       |
| During Pregnancy                                             | 2.38                  | 1.93                     | 2.93 | <0.01                      | 2.52      | 2.03         | 3.11                       | <0.01          | 1.55      | 1.21                       | 1.99 | <0.01          | 1.53 | 1.19 | 1.97 | <0.01 |
| 1st Trimester                                                | 2.41                  | 1.88                     | 3.08 | <0.01                      | 2.58      | 2.01         | 3.31                       | <0.01          | 1.63      | 1.24                       | 2.14 | <0.01          | 1.57 | 1.18 | 2.09 | <0.01 |
| 2nd Trimester                                                | 2.36                  | 1.83                     | 3.04 | <0.01                      | 2.53      | 1.96         | 3.27                       | <0.01          | 1.52      | 1.14                       | 2.01 | <0.01          | 1.47 | 1.10 | 1.96 | <0.01 |
| 3rd Trimester                                                | 2.23                  | 1.72                     | 2.89 | <0.01                      | 2.38      | 1.84         | 3.10                       | <0.01          | 1.34      | 1.01                       | 1.80 | 0.05           | 1.35 | 1.01 | 1.81 | 0.04  |

<sup>a</sup>Model 1 adjusted maternal age at delivery, infant's gender, birth year, birth hospital, parity, maternal underlying illness before delivery (pre-existing diabetes, epilepsy, gestational diabetes, hypertension; yes/no) and socioeconomic status.

<sup>b</sup>Model 2 adjusted all the factors in model 1 and maternal psychiatric conditions.

<sup>c</sup>Model 3 adjusted all the factors in model 2 and other psychiatric medication use.

<sup>d</sup>HR=Hazard ratio

<sup>e</sup>CI=Confidence interval

**Supplementary material 5: Sensitivity analysis of excluding children with ADHD medication but without ADHD diagnosis**

| <b>Exposure</b>                                                                              | <b>Crude estimate</b> |                          |      | <b>Model 1<sup>a</sup></b> |              |      | <b>Model 2<sup>b</sup></b> |              |      | <b>Model 3<sup>c</sup></b> |              |       |      |      |      |       |
|----------------------------------------------------------------------------------------------|-----------------------|--------------------------|------|----------------------------|--------------|------|----------------------------|--------------|------|----------------------------|--------------|-------|------|------|------|-------|
|                                                                                              | <b>HR<sup>d</sup></b> | <b>95%CI<sup>e</sup></b> |      | <b>HR</b>                  | <b>95%CI</b> |      | <b>HR</b>                  | <b>95%CI</b> |      | <b>HR</b>                  | <b>95%CI</b> |       |      |      |      |       |
| <b><i>Antidepressants (excluded children with ADHD medication but no ADHD diagnosis)</i></b> |                       |                          |      |                            |              |      |                            |              |      |                            |              |       |      |      |      |       |
| During Pregnancy                                                                             | 2.01                  | 1.52                     | 2.66 | <0.01                      | 2.14         | 1.62 | 2.85                       | <0.01        | 1.28 | 0.93                       | 1.76         | 0.13  | 1.27 | 0.92 | 1.75 | 0.14  |
| 1st Trimester                                                                                | 2.09                  | 1.49                     | 2.92 | <0.01                      | 2.27         | 1.62 | 3.18                       | <0.01        | 1.40 | 0.98                       | 2.02         | 0.07  | 1.37 | 0.95 | 1.99 | 0.09  |
| 2nd Trimester                                                                                | 1.96                  | 1.33                     | 2.89 | <0.01                      | 2.19         | 1.48 | 3.24                       | <0.01        | 1.27 | 0.84                       | 1.91         | 0.26  | 1.27 | 0.84 | 1.91 | 0.26  |
| 3rd Trimester                                                                                | 2.19                  | 1.54                     | 3.12 | <0.01                      | 2.36         | 1.65 | 3.37                       | <0.01        | 1.33 | 0.91                       | 1.96         | 0.14  | 1.37 | 0.93 | 2.03 | 0.11  |
| <b><i>SSRIs (excluded children with ADHD medication but no ADHD diagnosis)</i></b>           |                       |                          |      |                            |              |      |                            |              |      |                            |              |       |      |      |      |       |
| During Pregnancy                                                                             | 1.58                  | 1.00                     | 2.48 | 0.05                       | 1.66         | 1.06 | 2.61                       | 0.03         | 0.92 | 0.57                       | 1.49         | 0.74  | 0.83 | 0.51 | 1.34 | 0.45  |
| 1st Trimester                                                                                | 1.65                  | 0.98                     | 2.79 | 0.06                       | 1.79         | 1.06 | 3.02                       | 0.03         | 1.03 | 0.59                       | 1.78         | 0.93  | 0.93 | 0.54 | 1.62 | 0.80  |
| 2nd Trimester                                                                                | 1.66                  | 0.89                     | 3.09 | 0.11                       | 1.80         | 0.96 | 3.37                       | 0.07         | 0.99 | 0.52                       | 1.89         | 0.98  | 0.93 | 0.49 | 1.77 | 0.83  |
| 3rd Trimester                                                                                | 1.49                  | 0.77                     | 2.87 | 0.24                       | 1.55         | 0.80 | 3.01                       | 0.19         | 0.83 | 0.42                       | 1.64         | 0.60  | 0.80 | 0.41 | 1.57 | 0.51  |
| <b><i>Non-SSRIs (excluded children with ADHD medication but no ADHD diagnosis)</i></b>       |                       |                          |      |                            |              |      |                            |              |      |                            |              |       |      |      |      |       |
| During Pregnancy                                                                             | 2.47                  | 1.80                     | 3.40 | <0.01                      | 2.65         | 1.92 | 3.66                       | <0.01        | 1.62 | 1.15                       | 2.30         | <0.01 | 1.66 | 1.17 | 2.34 | <0.01 |
| 1st Trimester                                                                                | 2.49                  | 1.65                     | 3.75 | <0.01                      | 2.72         | 1.79 | 4.12                       | <0.01        | 1.73 | 1.13                       | 2.66         | 0.01  | 1.71 | 1.11 | 2.65 | 0.02  |
| 2nd Trimester                                                                                | 2.32                  | 1.48                     | 3.64 | <0.01                      | 2.62         | 1.66 | 4.16                       | <0.01        | 1.55 | 0.96                       | 2.49         | 0.07  | 1.56 | 0.97 | 2.51 | 0.07  |
| 3rd Trimester                                                                                | 2.83                  | 1.91                     | 4.20 | <0.01                      | 3.07         | 2.06 | 4.56                       | <0.01        | 1.76 | 1.15                       | 2.68         | <0.01 | 1.84 | 1.20 | 2.81 | <0.01 |

<sup>a</sup>Model 1 adjusted maternal age at delivery, infant's gender, birth year, birth hospital, parity, maternal underlying illness before delivery (pre-existing diabetes, epilepsy, gestational diabetes, hypertension; yes/no) and socioeconomic status.

<sup>b</sup>Model 2 adjusted all the factors in model 1 and maternal psychiatric conditions.

<sup>c</sup>Model 3 adjusted all the factors in model 2 and other psychiatric medication use.

<sup>d</sup>HR=Hazard ratio

<sup>e</sup>CI=Confidence interval

Supplementary material 6: Sensitivity analysis of including the first pregnancy only

| <b>Exposure</b>                                      | <b>Crude estimate</b> |                          |      |                | <b>Model 1<sup>a</sup></b> |              |      | <b>Model 2<sup>b</sup></b> |           |              | <b>Model 3<sup>c</sup></b> |                |           |              |      |                |
|------------------------------------------------------|-----------------------|--------------------------|------|----------------|----------------------------|--------------|------|----------------------------|-----------|--------------|----------------------------|----------------|-----------|--------------|------|----------------|
|                                                      | <b>HR<sup>d</sup></b> | <b>95%CI<sup>e</sup></b> |      | <b>p-value</b> | <b>HR</b>                  | <b>95%CI</b> |      | <b>p-value</b>             | <b>HR</b> | <b>95%CI</b> |                            | <b>p-value</b> | <b>HR</b> | <b>95%CI</b> |      | <b>p-value</b> |
| <b><i>Antidepressants (first pregnancy only)</i></b> |                       |                          |      |                |                            |              |      |                            |           |              |                            |                |           |              |      |                |
| During Pregnancy                                     | 2.92                  | 2.12                     | 4.02 | <0.01          | 2.68                       | 1.95         | 3.70 | <0.01                      | 1.82      | 1.27         | 2.60                       | <0.01          | 1.82      | 1.27         | 2.62 | <0.01          |
| 1st Trimester                                        | 2.94                  | 1.97                     | 4.39 | <0.01          | 2.79                       | 1.87         | 4.18 | <0.01                      | 1.88      | 1.23         | 2.88                       | <0.01          | 1.84      | 1.18         | 2.86 | <0.01          |
| 2nd Trimester                                        | 3.16                  | 2.04                     | 4.91 | <0.01          | 3.10                       | 2.00         | 4.82 | <0.01                      | 1.98      | 1.24         | 3.16                       | <0.01          | 1.95      | 1.21         | 3.14 | <0.01          |
| 3rd Trimester                                        | 3.17                  | 2.12                     | 4.73 | <0.01          | 3.00                       | 2.01         | 4.49 | <0.01                      | 1.92      | 1.25         | 2.97                       | <0.01          | 1.95      | 1.26         | 3.01 | <0.01          |
| <b><i>SSRIs (first pregnancy only)</i></b>           |                       |                          |      |                |                            |              |      |                            |           |              |                            |                |           |              |      |                |
| During Pregnancy                                     | 2.87                  | 1.81                     | 4.57 | <0.01          | 2.58                       | 1.63         | 4.11 | <0.01                      | 1.59      | 0.98         | 2.60                       | 0.06           | 1.37      | 0.83         | 2.27 | 0.22           |
| 1st Trimester                                        | 3.07                  | 1.78                     | 5.29 | <0.01          | 2.87                       | 1.66         | 4.95 | <0.01                      | 1.77      | 1.00         | 3.12                       | 0.05           | 1.60      | 0.90         | 2.84 | 0.11           |
| 2nd Trimester                                        | 2.71                  | 1.35                     | 5.41 | <0.01          | 2.53                       | 1.27         | 5.07 | <0.01                      | 1.53      | 0.75         | 3.11                       | 0.25           | 1.33      | 0.64         | 2.74 | 0.44           |
| 3rd Trimester                                        | 3.43                  | 1.90                     | 6.19 | <0.01          | 3.22                       | 1.78         | 5.82 | <0.01                      | 1.94      | 1.05         | 3.59                       | 0.03           | 1.77      | 0.95         | 3.30 | 0.07           |
| <b><i>Non-SSRIs (first pregnancy only)</i></b>       |                       |                          |      |                |                            |              |      |                            |           |              |                            |                |           |              |      |                |
| During Pregnancy                                     | 3.42                  | 2.36                     | 4.96 | <0.01          | 3.17                       | 2.19         | 4.61 | <0.01                      | 2.16      | 1.45         | 3.22                       | <0.01          | 2.06      | 1.36         | 3.11 | <0.01          |
| 1st Trimester                                        | 3.12                  | 1.84                     | 5.27 | <0.01          | 2.98                       | 1.76         | 5.03 | <0.01                      | 2.08      | 1.21         | 3.57                       | <0.01          | 1.91      | 1.10         | 3.33 | 0.02           |
| 2nd Trimester                                        | 3.47                  | 2.02                     | 5.97 | <0.01          | 3.42                       | 1.98         | 5.89 | <0.01                      | 2.16      | 1.23         | 3.80                       | <0.01          | 2.05      | 1.15         | 3.66 | 0.02           |
| 3rd Trimester                                        | 3.50                  | 2.17                     | 5.63 | <0.01          | 3.34                       | 2.07         | 5.38 | <0.01                      | 2.12      | 1.28         | 3.50                       | <0.01          | 2.04      | 1.23         | 3.40 | <0.01          |

<sup>a</sup>Model 1 adjusted maternal age at delivery, infant's gender, birth year, birth hospital, parity, maternal underlying illness before delivery (pre-existing diabetes, epilepsy, gestational diabetes, hypertension; yes/no) and socioeconomic status.

<sup>b</sup>Model 2 adjusted all the factors in model 1 and maternal psychiatric conditions.

<sup>c</sup>Model 3 adjusted all the factors in model 2 and other psychiatric medication use.

<sup>d</sup>HR=Hazard ratio

<sup>e</sup>CI=Confidence interval

Supplementary material 7: Sensitivity analysis: start of follow-up at 5 years old

| <b>Exposure</b>                                                  | <b>Crude estimate</b> |                          |      | <b>Model 1<sup>a</sup></b> |           |              | <b>Model 2<sup>b</sup></b> |                |           | <b>Model 3<sup>c</sup></b> |      |                |      |      |      |       |
|------------------------------------------------------------------|-----------------------|--------------------------|------|----------------------------|-----------|--------------|----------------------------|----------------|-----------|----------------------------|------|----------------|------|------|------|-------|
|                                                                  | <b>HR<sup>d</sup></b> | <b>95%CI<sup>e</sup></b> |      | <b>p-value</b>             | <b>HR</b> | <b>95%CI</b> |                            | <b>p-value</b> | <b>HR</b> | <b>95%CI</b>               |      | <b>p-value</b> |      |      |      |       |
| <b><i>Antidepressants (Follow-up started at 5 years old)</i></b> |                       |                          |      |                            |           |              |                            |                |           |                            |      |                |      |      |      |       |
| During Pregnancy                                                 | 2.30                  | 1.83                     | 2.90 | <0.01                      | 2.24      | 1.78         | 2.83                       | <0.01          | 1.35      | 1.04                       | 1.76 | 0.03           | 1.33 | 1.02 | 1.74 | 0.03  |
| 1st Trimester                                                    | 2.36                  | 1.79                     | 3.12 | <0.01                      | 2.29      | 1.73         | 3.04                       | <0.01          | 1.41      | 1.04                       | 1.91 | 0.03           | 1.36 | 0.99 | 1.80 | 0.05  |
| 2nd Trimester                                                    | 2.49                  | 1.84                     | 3.36 | <0.01                      | 2.45      | 1.80         | 3.31                       | <0.01          | 1.43      | 1.03                       | 1.98 | 0.03           | 1.42 | 1.02 | 1.97 | 0.04  |
| 3rd Trimester                                                    | 2.39                  | 1.77                     | 3.22 | <0.01                      | 2.36      | 1.75         | 3.18                       | <0.01          | 1.32      | 0.95                       | 1.83 | 0.09           | 1.36 | 0.98 | 1.89 | 0.07  |
| <b><i>SSRIs (Follow-up started at 5 years old)</i></b>           |                       |                          |      |                            |           |              |                            |                |           |                            |      |                |      |      |      |       |
| During Pregnancy                                                 | 2.19                  | 1.56                     | 3.06 | <0.01                      | 2.04      | 1.45         | 2.86                       | <0.01          | 1.15      | 0.80                       | 1.66 | 0.45           | 1.05 | 0.72 | 1.51 | 0.81  |
| 1st Trimester                                                    | 2.29                  | 1.55                     | 3.39 | <0.01                      | 2.16      | 1.45         | 3.20                       | <0.01          | 1.25      | 0.82                       | 1.89 | 0.30           | 1.13 | 0.74 | 1.72 | 0.57  |
| 2nd Trimester                                                    | 2.19                  | 1.36                     | 3.54 | <0.01                      | 2.06      | 1.27         | 3.35                       | <0.01          | 1.14      | 0.69                       | 1.89 | 0.61           | 1.06 | 0.64 | 1.76 | 0.81  |
| 3rd Trimester                                                    | 2.16                  | 1.34                     | 3.49 | <0.01                      | 1.99      | 1.23         | 3.24                       | <0.01          | 1.07      | 0.65                       | 1.77 | 0.78           | 1.05 | 0.64 | 1.74 | 0.84  |
| <b><i>Non-SSRIs (Follow-up started at 5 years old)</i></b>       |                       |                          |      |                            |           |              |                            |                |           |                            |      |                |      |      |      |       |
| During Pregnancy                                                 | 2.59                  | 1.97                     | 3.40 | <0.01                      | 2.58      | 1.96         | 3.40                       | <0.01          | 1.56      | 1.16                       | 2.10 | <0.01          | 1.53 | 1.14 | 2.07 | <0.01 |
| 1st Trimester                                                    | 2.65                  | 1.87                     | 3.75 | <0.01                      | 2.62      | 1.84         | 3.73                       | <0.01          | 1.64      | 1.14                       | 2.37 | <0.01          | 1.56 | 1.07 | 2.26 | 0.02  |
| 2nd Trimester                                                    | 2.78                  | 1.94                     | 3.99 | <0.01                      | 2.81      | 1.95         | 4.05                       | <0.01          | 1.66      | 1.13                       | 2.42 | <0.01          | 1.64 | 1.11 | 2.41 | 0.01  |
| 3rd Trimester                                                    | 2.70                  | 1.90                     | 3.84 | <0.01                      | 2.75      | 1.93         | 3.93                       | <0.01          | 1.54      | 1.06                       | 2.25 | 0.02           | 1.58 | 1.08 | 2.32 | 0.02  |

<sup>a</sup>Model 1 adjusted maternal age at delivery, infant's gender, birth year, birth hospital, parity, maternal underlying illness before delivery (pre-existing diabetes, epilepsy, gestational diabetes, hypertension; yes/no) and socioeconomic status.

<sup>b</sup>Model 2 adjusted all the factors in model 1 and maternal psychiatric conditions.

<sup>c</sup>Model 3 adjusted all the factors in model 2 and other psychiatric medication use.

<sup>d</sup>HR=Hazard ratio

<sup>e</sup>CI=Confidence interval



Supplementary material 8: Sensitivity analysis: adjust maternal depression, anxiety and substance abuse only

| <b>Exposure</b>                                                  | <b>Crude estimate</b> |                          |      | <b>Model 1<sup>a</sup></b> |           |              | <b>Model 2<sup>b</sup></b> |                |           | <b>Model 3<sup>c</sup></b> |      |                |      |      |      |       |
|------------------------------------------------------------------|-----------------------|--------------------------|------|----------------------------|-----------|--------------|----------------------------|----------------|-----------|----------------------------|------|----------------|------|------|------|-------|
|                                                                  | <b>HR<sup>d</sup></b> | <b>95%CI<sup>e</sup></b> |      | <b>p-value</b>             | <b>HR</b> | <b>95%CI</b> |                            | <b>p-value</b> | <b>HR</b> | <b>95%CI</b>               |      | <b>p-value</b> |      |      |      |       |
| <b><i>Antidepressants (Follow-up started at 5 years old)</i></b> |                       |                          |      |                            |           |              |                            |                |           |                            |      |                |      |      |      |       |
| During Pregnancy                                                 | 2.26                  | 1.80                     | 2.84 | <0.01                      | 2.39      | 1.90         | 3.02                       | <0.01          | 1.75      | 1.36                       | 2.26 | <0.01          | 1.61 | 1.23 | 2.11 | <0.01 |
| 1st Trimester                                                    | 2.29                  | 1.74                     | 3.03 | <0.01                      | 2.45      | 1.85         | 3.25                       | <0.01          | 1.91      | 1.43                       | 2.56 | <0.01          | 1.68 | 1.22 | 2.31 | <0.01 |
| 2nd Trimester                                                    | 2.41                  | 1.78                     | 3.26 | <0.01                      | 2.65      | 1.96         | 3.59                       | <0.01          | 1.92      | 1.40                       | 2.64 | <0.01          | 1.76 | 1.26 | 2.46 | <0.01 |
| 3rd Trimester                                                    | 2.37                  | 1.76                     | 3.17 | <0.01                      | 2.55      | 1.90         | 3.42                       | <0.01          | 1.72      | 1.25                       | 2.37 | <0.01          | 1.69 | 1.21 | 2.36 | <0.01 |
| <b><i>SSRIs (Follow-up started at 5 years old)</i></b>           |                       |                          |      |                            |           |              |                            |                |           |                            |      |                |      |      |      |       |
| During Pregnancy                                                 | 2.17                  | 1.56                     | 3.03 | <0.01                      | 2.23      | 1.60         | 3.12                       | <0.01          | 1.58      | 1.11                       | 2.25 | 0.01           | 1.28 | 0.89 | 1.84 | 0.19  |
| 1st Trimester                                                    | 2.21                  | 1.49                     | 3.27 | <0.01                      | 2.32      | 1.57         | 3.45                       | <0.01          | 1.74      | 1.16                       | 2.62 | <0.01          | 1.39 | 0.91 | 2.11 | 0.13  |
| 2nd Trimester                                                    | 2.11                  | 1.31                     | 3.41 | <0.01                      | 2.22      | 1.37         | 3.60                       | <0.01          | 1.58      | 0.96                       | 2.60 | 0.07           | 1.31 | 0.80 | 2.17 | 0.29  |
| 3rd Trimester                                                    | 2.21                  | 1.38                     | 3.52 | <0.01                      | 2.26      | 1.41         | 3.63                       | <0.01          | 1.46      | 0.90                       | 2.38 | 0.13           | 1.33 | 0.82 | 2.18 | 0.25  |
| <b><i>Non-SSRIs (Follow-up started at 5 years old)</i></b>       |                       |                          |      |                            |           |              |                            |                |           |                            |      |                |      |      |      |       |
| During Pregnancy                                                 | 2.56                  | 1.95                     | 3.35 | <0.01                      | 2.76      | 2.10         | 3.62                       | <0.01          | 1.98      | 1.48                       | 2.65 | <0.01          | 1.76 | 1.30 | 2.38 | <0.01 |
| 1st Trimester                                                    | 2.57                  | 1.82                     | 3.64 | <0.01                      | 2.80      | 1.96         | 3.99                       | <0.01          | 2.19      | 1.52                       | 3.14 | <0.01          | 1.82 | 1.24 | 2.68 | <0.01 |
| 2nd Trimester                                                    | 2.70                  | 1.88                     | 3.86 | <0.01                      | 3.04      | 2.12         | 4.38                       | <0.01          | 2.18      | 1.49                       | 3.17 | <0.01          | 1.93 | 1.30 | 2.87 | <0.01 |
| 3rd Trimester                                                    | 2.70                  | 1.91                     | 3.83 | <0.01                      | 2.96      | 2.08         | 4.20                       | <0.01          | 1.98      | 1.37                       | 2.56 | <0.01          | 1.90 | 1.29 | 2.80 | <0.01 |

<sup>a</sup>Model 1 adjusted maternal age at delivery, infant's gender, birth year, birth hospital, parity, maternal underlying illness before delivery (pre-existing diabetes, epilepsy, gestational diabetes, hypertension; yes/no) and socioeconomic status.

<sup>b</sup>Model 2 adjusted all the factors in model 1 and maternal psychiatric conditions.

<sup>c</sup>Model 3 adjusted all the factors in model 2 and other psychiatric medication use.

<sup>d</sup>HR=Hazard ratio

<sup>e</sup>CI=Confidence interval

Supplementary material 9: Comparisons of antidepressant exposure rate

| <b>Study</b>      | <b>Percentage of exposed children</b> | <b>Standardised difference</b> |
|-------------------|---------------------------------------|--------------------------------|
| Our current study | 0.7%                                  | --                             |
| Castro 2016       | 1.5%                                  | -0.086                         |
| Clements 2015     | 1.6%                                  | -0.093                         |
| Figueroa 2010     | 2.7%                                  | -0.16                          |
| Laugesen 2013     | 1.7%                                  | -0.078                         |
| Malm 2016         | 0.6%                                  | 0.0072                         |
| Sujan 2017        | 1.4%                                  | -0.069                         |

Reference:

Figueroa R. Use of Antidepressants During Pregnancy and Risk of Attention-Deficit/Hyperactivity Disorder in the Offspring. *J Dev Behav Pediatr* 2010; 31(8): 641-8.

Castro VM, Kong SW, Clements CC, et al. Absence of evidence for increase in risk for autism or attention-deficit hyperactivity disorder following antidepressant exposure during pregnancy: a replication study. *Transl Psychiatry* 2016; 6.

Clements CC, Castro VM, Blumenthal SR, et al. Prenatal antidepressant exposure is associated with risk for attention-deficit hyperactivity disorder but not autism spectrum disorder in a large health system. *Mol Psychiatry* 2015; 20(6): 727-34

Laugesen K, Olsen MS, Telén Andersen AB, Frøslev T, Sørensen HT. In utero exposure to antidepressant drugs and risk of attention deficit hyperactivity disorder: a nationwide Danish cohort study. *BMJ Open*. 2013 Sep 20;3(9):e003507. doi: 10.1136/bmjopen-2013-003507.

Malm H, Brown AS, Gissler M, et al. Gestational Exposure to Selective Serotonin Reuptake Inhibitors and Offspring Psychiatric Disorders: A National Register-Based Study. *J Am Acad Child Adolesc Psychiatry* 2016 May;55(5):359-66. doi: 10.1016/j.jaac.2016.02.013.

Sujan AC, Rickert ME, Öberg A, et al. Associations of maternal antidepressant use during the first trimester of pregnancy with preterm birth, small for gestational age, autism spectrum disorder, and attention-deficit/hyperactivity disorder in offspring. *JAMA* 2017; 317(15): 1553-62.
